# Supplementary material for: Computational tissue staining of non-linear multimodal imaging using supervised and unsupervised deep learning
Source: PubMed Central journal article supplement (PMC8086483; doi:10.1364/boe.415962), 2021-03-23
Supplement: boe-12-4-2280-s001.pdf [file boe-12-4-2280-s001.pdf]

## Computational tissue staining of non-linear multimodal imaging using supervised and unsupervised deep learning: supplement

**PRANITA PRADHAN,<sup>1,2</sup>  TOBIAS MEYER,<sup>2</sup> MICHAEL VIETH,<sup>3</sup> ANDREAS STALLMACH,<sup>4</sup> MAXIMILIAN WALDNER,<sup>5,6</sup> MICHAEL SCHMITT,<sup>1</sup> JUERGEN POPP,<sup>1,2</sup> AND THOMAS BOCKLITZ<sup>1,2,\*</sup> **

<sup>1</sup>*Institute of Physical Chemistry and Abbe Center of Photonics, Friedrich-Schiller-University, Jena, Germany*

<sup>2</sup>*Leibniz Institute of Photonic Technology, Member of Leibniz Health Technologies Jena, Germany*

<sup>3</sup>*Institute of Pathology, Klinikum Bayreuth, Bayreuth, Germany*

<sup>4</sup>*Department of Internal Medicine IV (Gastroenterology, Hepatology, and Infectious Diseases), Jena University Hospital, Jena, Germany*

<sup>5</sup>*Erlangen Graduate School in Advanced Optical Technologies (SAOT), Friedrich-Alexander University of Erlangen-Nuremberg, 91052 Erlangen, Germany*

<sup>6</sup>*Medical Department I, Friedrich-Alexander University of Erlangen-Nuremberg, Erlangen, Germany*

\*[thomas.bocklitz@uni-jena.de](mailto:thomas.bocklitz@uni-jena.de)

---

This supplement published with The Optical Society on 23 March 2021 by The Authors under the terms of the [Creative Commons Attribution 4.0 License](https://creativecommons.org/licenses/by/4.0/) in the format provided by the authors and unedited. Further distribution of this work must maintain attribution to the author(s) and the published article's title, journal citation, and DOI.

Supplement DOI: <https://doi.org/10.6084/m9.figshare.14046467>

Parent Article DOI: <https://doi.org/10.1364/BOE.415962>

# Computational tissue staining of non-linear multimodal imaging using supervised and unsupervised deep learning

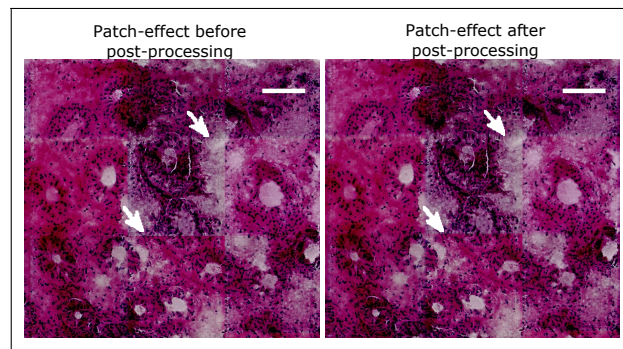

**Fig. S1.** This figure shows the effect of post-processing for removing 'patch-effect'. The 'patch-effect' was removed by interpolating pixel values of three neighbouring pixels at the end of every patch (256<sup>th</sup> pixel). This effect (shown in white arrows) was visible for few images and its removal did not significantly affect the performance metrics. The scale bar represents 100  $\mu\text{m}$

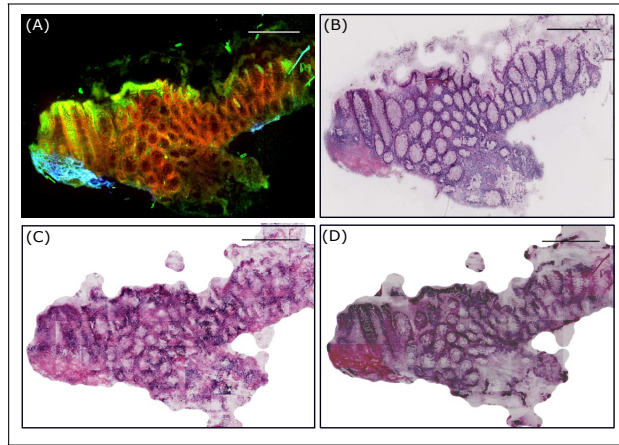

**Fig. S2.** (A) shows a non-linear multimodal image from test dataset, (B) visualizes corresponding histopathologically stained H&E image (unregistered), (C) shows the computational H&E image by the Pix2Pix (MSE =  $4.4 \times 10^3$ , SSIM = 0.65, CSS = 0.94) and (D) depicts computational H&E image by the cycle CGAN model (MSE =  $8.4 \times 10^3$ , SSIM = 0.63, CSS = 0.94). The contrast of the computational H&E image in (D) is reduced by a factor of 0.7. The images here are downsampled to 20% of original size for clarity. The scale bar represents 100  $\mu\text{m}$ .

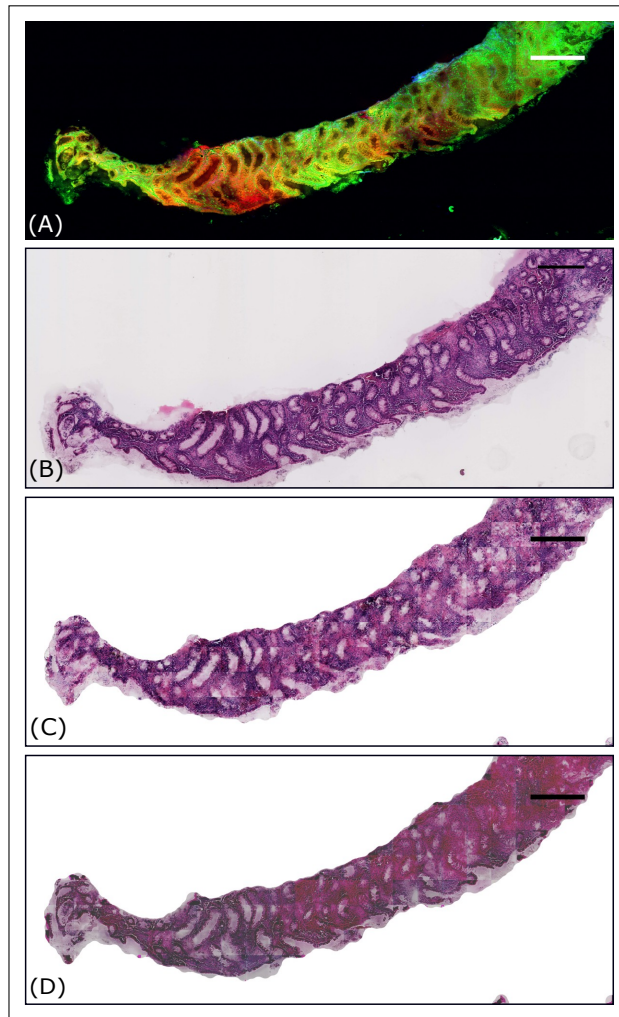

**Fig. S3.** (A) shows a non-linear multimodal image from training dataset, (B) visualizes corresponding histopathologically stained H&E image (unregistered), (C) shows the computational H&E image by the Pix2Pix (MSE =  $2.8 \cdot 10^3$ , SSIM = 0.74, CSS = 0.96) and (D) depicts computational H&E image by the cycle CGAN model (MSE =  $5.9 \cdot 10^3$ , SSIM = 0.72, CSS = 0.94). The contrast of the computational H&E image in (D) is reduced by a factor of 0.7. The images here are downsampled to 20% of original size for clarity. The scale bar represents  $100 \mu\text{m}$ .

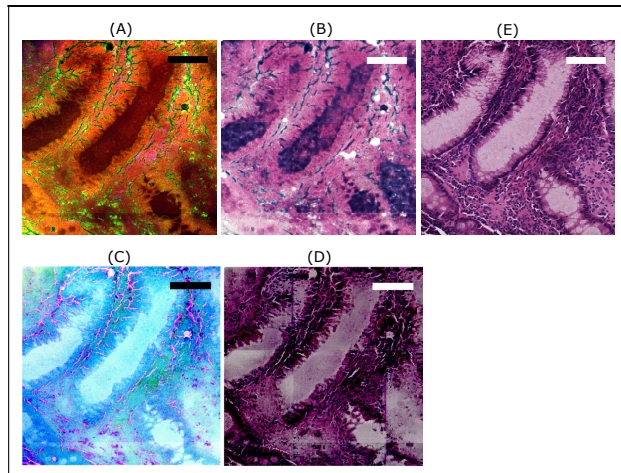

**Fig. S4.** This figure shows effect of ‘contrast inversion’ on the computational H&E images of the cycle CGAN model. (A) shows an original MM patch given to the cycle CGAN model and (B) visualizes the generated H&E patch. Here, we see that the colors in the generated H&E image are inverted when compared to the pathologically stained H&E patch shown in (E). Contrarily, (C) shows a contrast inverted MM patch and (D) depicts the generated H&E patch by the cycle CGAN model. Here, the color contrast is similar to the pathologically stained H&E patch shown in (E). The scale bar represents 100  $\mu\text{m}$ .

**Table S1.** The quantitative metrics namely mean squared error (MSE), structure similarity index (SSIM) and color similarity index (CSS) evaluated for 19 images from the training and testing dataset is given for the Pix2Pix and the cycle CGAN models, respectively.

| Image    | Pix2Pix |      |      | Cycle CGAN |      |      |
|----------|---------|------|------|------------|------|------|
|          | MSE     | SSIM | CSS  | MSE        | SSIM | CSS  |
| Train 1  | 3601.43 | 0.61 | 0.94 | 9373.09    | 0.57 | 0.92 |
| Train 2  | 2800.83 | 0.74 | 0.96 | 5890.62    | 0.72 | 0.94 |
| Train 3  | 4984.19 | 0.38 | 0.89 | 13955.34   | 0.33 | 0.89 |
| Train 4  | 3337.39 | 0.56 | 0.93 | 8157.08    | 0.53 | 0.93 |
| Train 5  | 4451.48 | 0.51 | 0.92 | 11509.74   | 0.47 | 0.90 |
| Train 6  | 5100.78 | 0.49 | 0.92 | 9629.29    | 0.46 | 0.89 |
| Train 7  | 4956.57 | 0.41 | 0.91 | 10389.17   | 0.38 | 0.90 |
| Train 8  | 4167.94 | 0.52 | 0.92 | 8376.58    | 0.49 | 0.90 |
| Train 9  | 7938.24 | 0.46 | 0.91 | 15823.56   | 0.41 | 0.91 |
| Train 10 | 7657.41 | 0.39 | 0.88 | 9725.03    | 0.36 | 0.88 |
| Train 11 | 3066.22 | 0.67 | 0.94 | 6749.37    | 0.65 | 0.93 |
| Train 12 | 3057.30 | 0.65 | 0.94 | 8129.79    | 0.62 | 0.93 |
| Train 13 | 5918.03 | 0.36 | 0.90 | 15783.79   | 0.30 | 0.90 |
| Test 1   | 5617.82 | 0.60 | 0.92 | 6600.03    | 0.59 | 0.91 |
| Test 2   | 3582.64 | 0.61 | 0.94 | 6633.59    | 0.60 | 0.94 |
| Test 3   | 3827.09 | 0.65 | 0.94 | 4767.95    | 0.63 | 0.94 |
| Test 4   | 3292.67 | 0.60 | 0.94 | 10118.23   | 0.58 | 0.93 |
| Test 5   | 4416.22 | 0.64 | 0.94 | 8408.46    | 0.63 | 0.94 |
| Test 6   | 4937.68 | 0.49 | 0.91 | 10265.39   | 0.48 | 0.93 |
